# Supplementary material
Source: PubMed Central journal article supplement (PMC1475668)

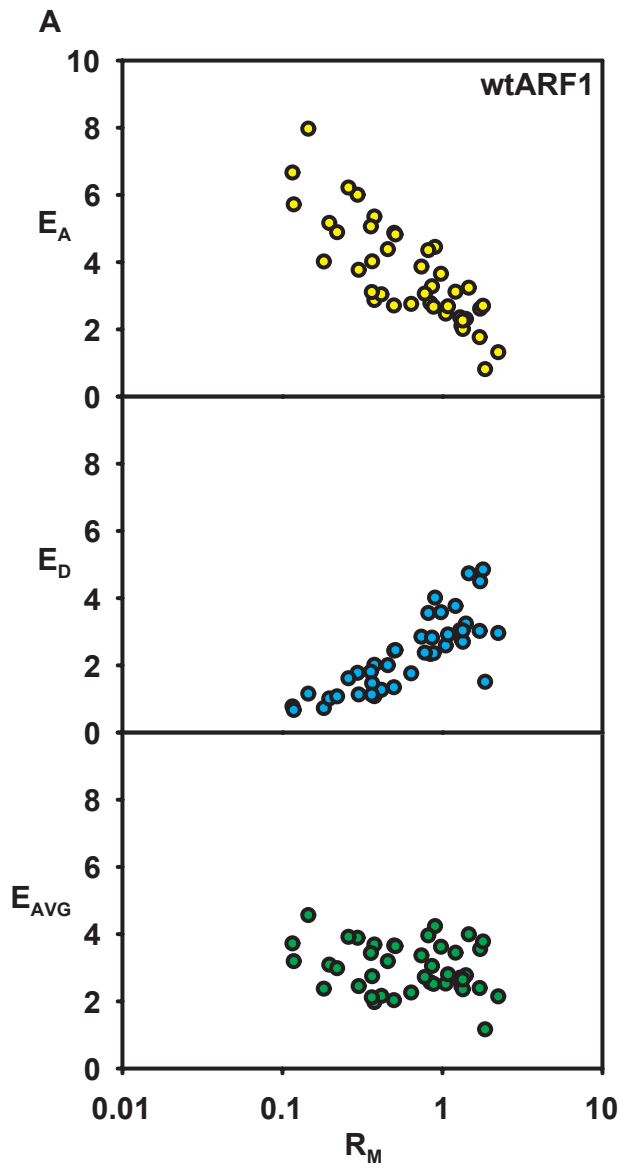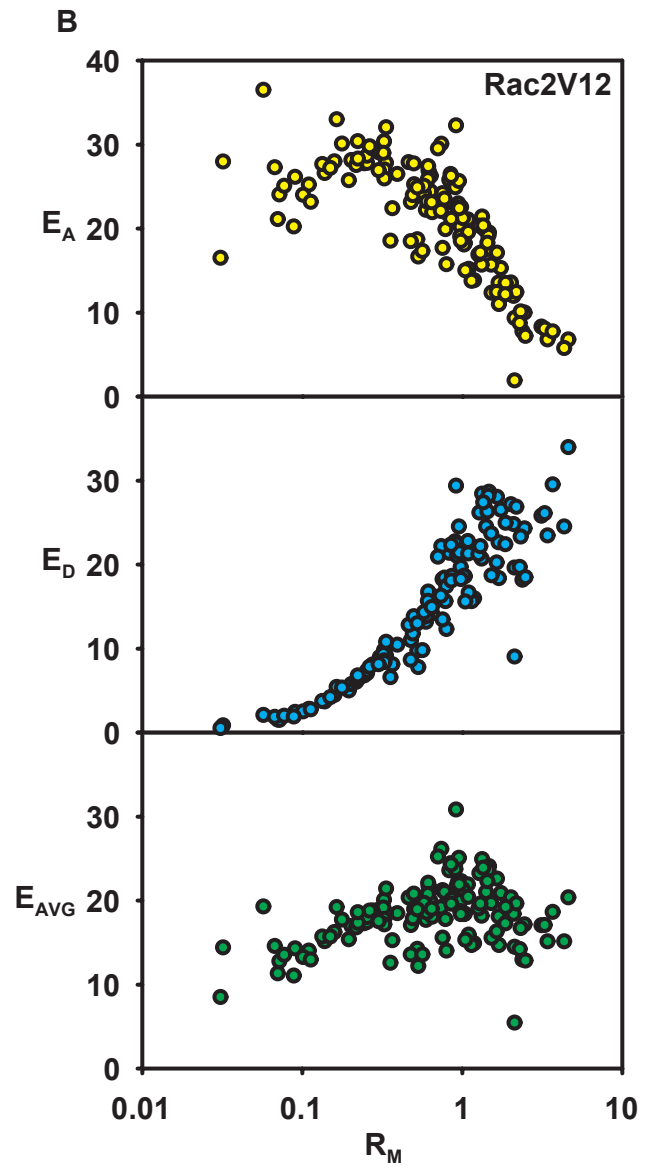

Supplement: pbio.0040162.sg001.pdf [file pbio.0040162.sg001.pdf]
